# Supplementary material
Source: ML conference proceedings conference paper supplement (https://openreview.net/forum?id=nvu9jVEqoo)
Supplement: supplementary_material [file Supplementary_Description.pdf › Supplementary_Description.pdf]

# LEARNING TEXT-DRIVEN 3D HUMAN MOTION GENERATION FROM 3D-FREE WEB VIDEOS

**Anonymous authors**

Paper under double-blind review

## A ADDITIONAL SUPPLEMENTARY MATERIAL DESCRIPTION

The supplementary materials we submitted include visualization results of our model alongside comparative demonstrations with other models. Specifically, we present 9 videos corresponding to the 9 visualizations shown in both the main text and the appendix. All textual descriptions accompanying these videos are sourced randomly from the **MotionWeb** test set. For comparison, we evaluate our model against three state-of-the-art (SOTA) models to demonstrate its superior capability in generating results that align more accurately with the given textual descriptions.
